# Supplementary material for: Phase Transitions by an Abundant Protein in the Anammox Extracellular Matrix Mediate Cell-to-Cell Aggregation and Biofilm Formation
Source: PubMed Central journal article supplement (PMC7482068; doi:10.1128/mbio.02052-20), 2020-09-08
Supplement: mBio.02052-20-sf002.pdf [file mBio.02052-20-sf002.pdf]

A

i)

VTPTPGVTPTPTGVGRILGQVTDSSISGAGINGAAVSLDTGEQTVTSTVGGQDGVYSFDNVAVGDRITITAAATGYITN  
TKTVTVTDGGVADGRIE

ii)

LTPEVIVTPSPVASPTPPQVGRILGQVTDSETSAGINGATVSLDTGEQTVTSTVGGQDGVYSFNDVAVGDRITITAA  
ATGYITNKTFTVTVTDGGVADGRIE

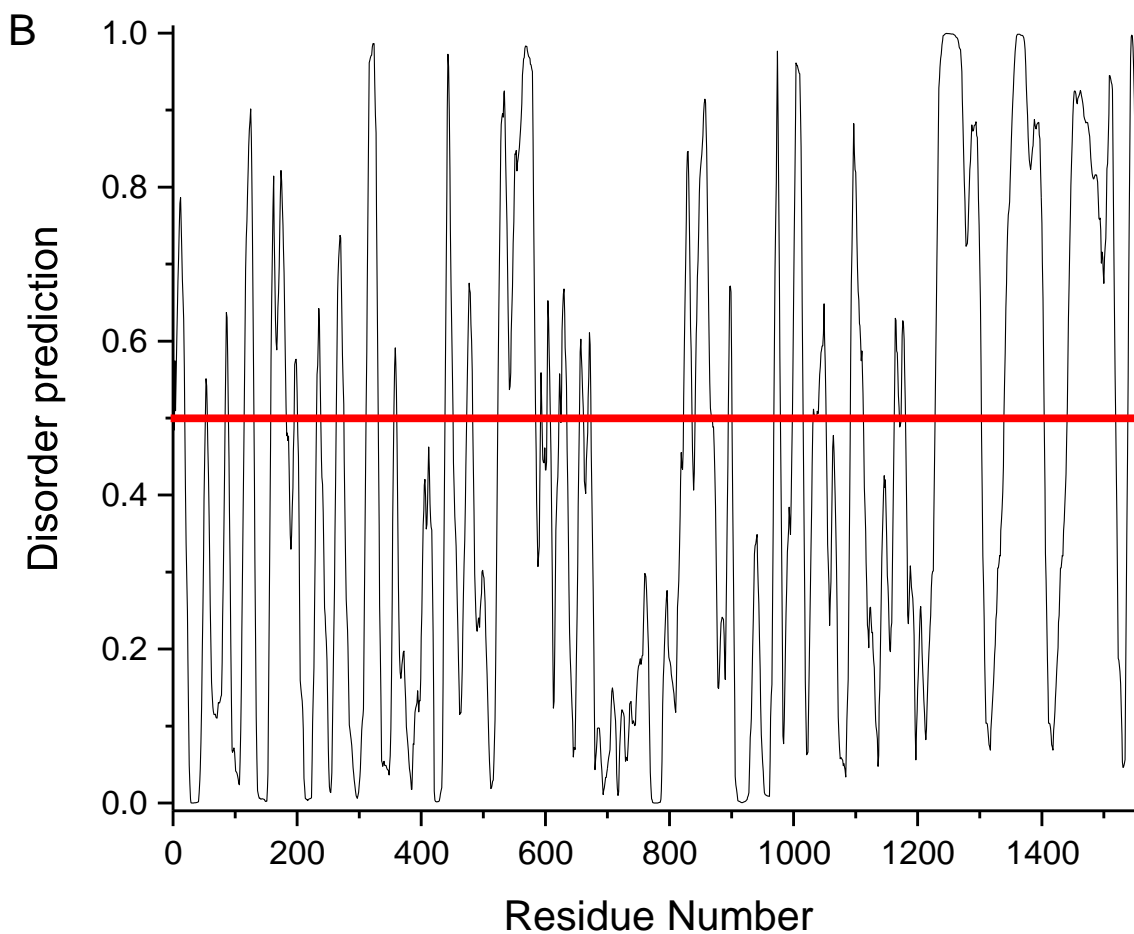

Figure S2: A) C-terminal repeat domains of Brosi\_A1236 from amino acids i) 1254-1338 and ii) 1354-1439. B) Intrinsic disorder prediction for Brosi\_A1236 by Predictor of Natural Disordered Regions (PONDR), with disorder prediction score > 0.5 indicating disordered regions.
