# Supplementary material for: Phase Transitions by an Abundant Protein in the Anammox Extracellular Matrix Mediate Cell-to-Cell Aggregation and Biofilm Formation
Source: PubMed Central journal article supplement (PMC7482068; doi:10.1128/mbio.02052-20), 2020-09-08
Supplement: mBio.02052-20-sf004.pdf [file mBio.02052-20-sf004.pdf]

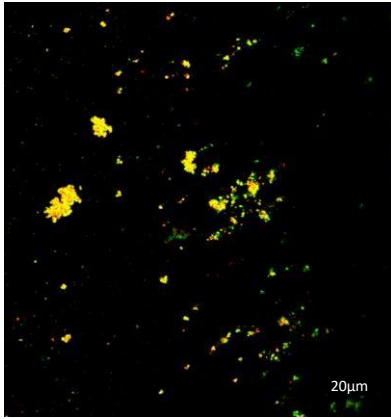

**Figure S4: Protein binding assay showing the coalescence of green and red microspheres with both pre-incubated with cadherin in the presence of 20 mM calcium (i.e. positive control)**
