# Supplementary material for: Phase Transitions by an Abundant Protein in the Anammox Extracellular Matrix Mediate Cell-to-Cell Aggregation and Biofilm Formation
Source: PubMed Central journal article supplement (PMC7482068; doi:10.1128/mbio.02052-20), 2020-09-08
Supplement: mBio.02052-20-sf005.pdf [file mBio.02052-20-sf005.pdf]

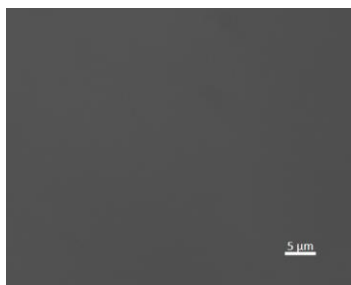

**Figure S5: Brightfield micrograph of aqueous solution of 20 mM Tris, pH 7.5, 125 mM NaCl, 2 mM DTT, 4 °C, following the addition of PEG (20% (w/v))**
